# Supplementary material
Source: publisher figshare collection journal article supplement (https://brill.figshare.com/ndownloader/files/24446345)

Auld, H.L. and J.-G.J. Godin. Courtship behaviour influences social partner choice in male guppies

**ELECTRONIC SUPPLEMENTARY MATERIALS**

**ESM 1: Male guppy courtship display (QuickTime mov.)**


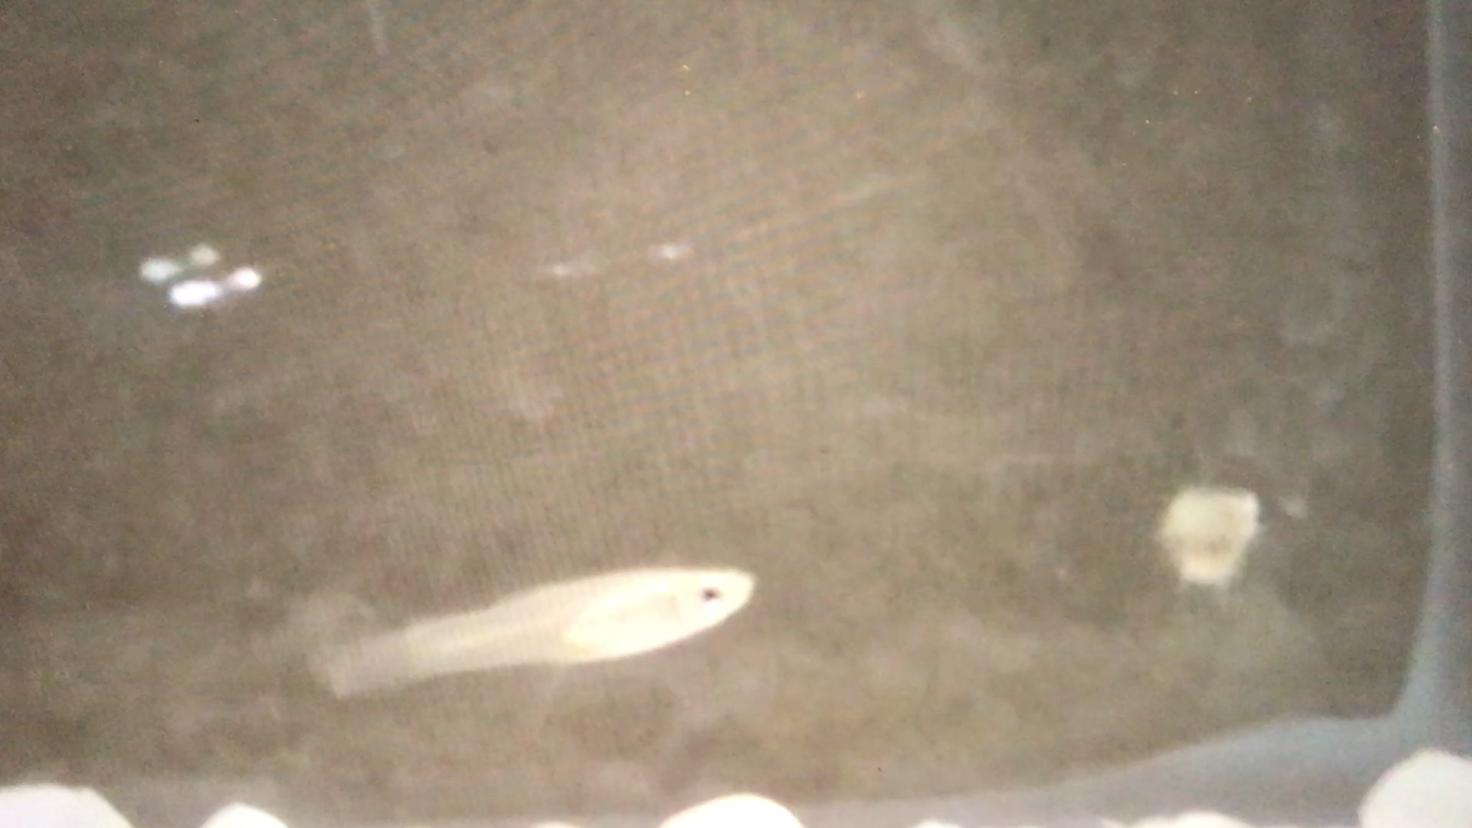

Supplement: Supplementary file 1 [file 24446345]
